# Supplementary material for: Orientational order in the splay nematic ground state
Source: Royal Society of Chemistry journal article supplement (doi:10.1039/c9cp03581h), 2019-01-01
Supplement: c9cp03581h1.pdf [file c9cp03581h1.pdf]

## 1. Small Angle X-ray Scattering

Small angle X-ray scattering was performed using a Bruker D8 Discover equipped with a temperature controlled, bored graphite rod furnace, custom built at the University of York. The radiation used was copper  $K\alpha$  ( $\lambda = 0.154056$  nm) from a  $1 \mu\text{S}$  microfocus source. Diffraction patterns were recorded on a  $2048 \times 2048$  pixel Bruker VANTEC 500 area detector set at a distance of 121 mm from the sample. Samples were filled into 1mm capillary tubes and aligned with a pair of 1T magnets, with the field strength at the sample position being approximately 0.6T. Diffraction patterns were collected as a function of temperature and the data processed using Matlab as follows. Two-dimensional scattering patterns were collected on cooling from the isotropic liquid until crystallisation in  $\sim 1.2$  °C intervals with a temperature accuracy of  $\pm 0.1$  °C. The 2D SAXS pattern from an empty capillary was used as a background; this was subtracted from each frame prior to the integration step.

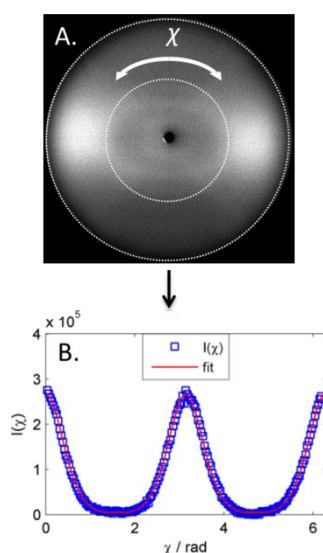

**Fig. SI-1:** (A) Background subtracted 2D SAXS pattern of RM734 at 139.8 °C; azimuthal integration gave the data shown in (B), fitting with Equation (1) allows the orientational order parameters  $\langle P_n \rangle$  from the coefficients used in the fitting process ( $f_{2n}$ ) via Equations (2 – 13).

## 2. Orientational Order Parameters

2D SAXS patterns were azimuthally averaged ( $1^\circ$  step size) to give scattered intensity as a function of  $\chi$  for each frame (see Figure SI-1). Orientational order parameters were calculated as described elsewhere;<sup>1-4</sup> briefly, fitting the integrated intensity with equation (1) gives the coefficients  $f_{2n}$ , these are then used to determine  $\langle \cos^n \beta \rangle$  via Equations 2-6. From the values of  $\langle \cos^n \beta \rangle$  the orientational order parameters  $\langle P_n \rangle$  can be calculated from Equations 5-11. The orientational

distribution function,  $f(\beta)$ , can be obtained from Equation (12) or equation (13) and is normalised against Equation (14).

$$I(X) = \sum_0^{\infty} \frac{\pi}{2} f_{2n} \frac{(2n-1)!!}{2^n n!} \cos^{2n} X \quad (1)$$

$$\langle \cos^2 \beta \rangle = \sum_{n=0}^{\infty} \frac{f_{2n}}{2n+3} / \sum_{n=0}^{\infty} \frac{f_{2n}}{2n+1} \quad (2)$$

$$\langle \cos^4 \beta \rangle = \sum_{n=0}^{\infty} \frac{f_{2n}}{2n+5} / \sum_{n=0}^{\infty} \frac{f_{2n}}{2n+1} \quad (3)$$

$$\langle \cos^6 \beta \rangle = \sum_{n=0}^{\infty} \frac{f_{2n}}{2n+7} / \sum_{n=0}^{\infty} \frac{f_{2n}}{2n+1} \quad (4)$$

$$\langle \cos^8 \beta \rangle = \sum_{n=0}^{\infty} \frac{f_{2n}}{2n+9} / \sum_{n=0}^{\infty} \frac{f_{2n}}{2n+1} \quad (5)$$

$$\langle \cos^{10} \beta \rangle = \sum_{n=0}^{\infty} \frac{f_{2n}}{2n+11} / \sum_{n=0}^{\infty} \frac{f_{2n}}{2n+1} \quad (6)$$

$$\langle P_2 \rangle = \frac{1}{2} (3 \langle \cos^2 \beta \rangle - 1) \quad (7)$$

$$\langle P_4 \rangle = \frac{1}{8} (35 \langle \cos^4 \beta \rangle - 30 \langle \cos^2 \beta \rangle + 3) \quad (8)$$

$$\langle P_6 \rangle = \frac{1}{16} (231 \langle \cos^6 \beta \rangle - 315 \langle \cos^4 \beta \rangle - 105 \langle \cos^2 \beta \rangle - 5) \quad (9)$$

$$\langle P_8 \rangle = \frac{1}{128} (6435 \langle \cos^8 \beta \rangle - 12012 \langle \cos^6 \beta \rangle + 6930 \langle \cos^4 \beta \rangle - 1260 \langle \cos^2 \beta \rangle + 35) \quad (10)$$

$$\langle P_{10} \rangle = \frac{1}{256} \left( \begin{array}{l} 46189 \langle \cos^{10} \beta \rangle - 109395 \langle \cos^8 \beta \rangle \\ + 90090 \langle \cos^6 \beta \rangle - 30030 \langle \cos^4 \beta \rangle + 3465 \langle \cos^2 \beta \rangle - 63 \end{array} \right) \quad (11)$$

$$f(\beta) = \sum_{n=0}^{\infty} \frac{1+4n}{2} \langle P_{2n} \rangle P_{2n}(\cos \beta) \quad (12)$$

$$f(\beta) = \sum_{n=0}^{\infty} f_{2n} \cos^{2n} \beta \quad (13)$$

$$\int_0^{\pi} f(\beta) \sin \beta d\beta = 1 \quad (14)$$



### 3. Supplementary Figures

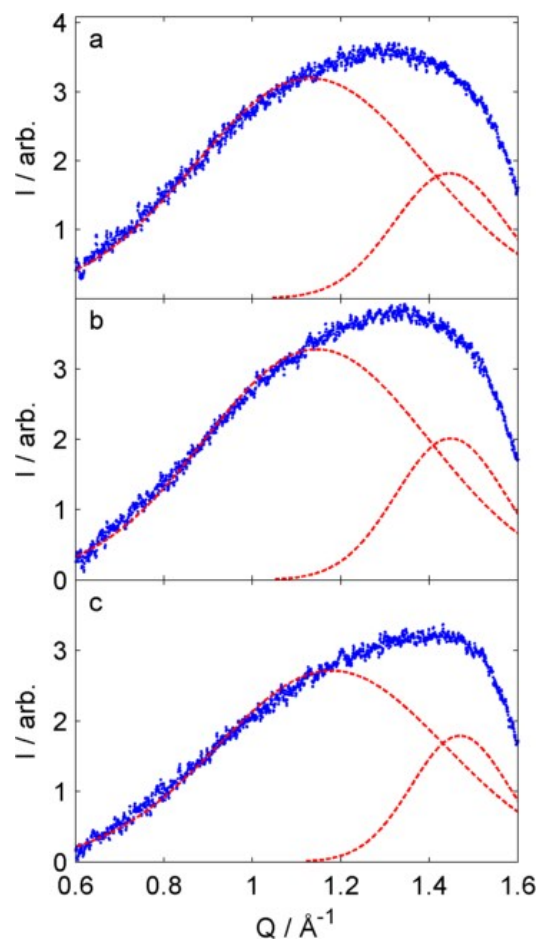

**Fig. SI-2:** Plots of wide-angle intensity (arb.) versus  $Q$  ( $\text{\AA}^{-1}$ ) for RM734 in the isotropic liquid at 190 °C (a), the nematic phase at 150 °C (b), the  $N_s$  phase at 112 °C (c). Dashed lines correspond to deconvoluted peaks

#### 4. Supplementary SAXS/WAXS Data

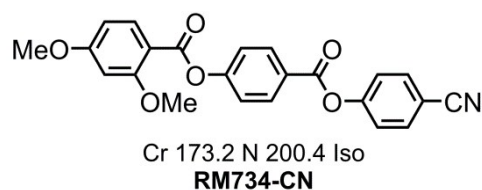

**Fig. SI-3:** The molecular structure and transition temperatures of RM734-CN. <sup>5</sup>

As discussed in the manuscript, the splay-nematic phase has (to date) only been observed for nitro-terminated materials, with the analogous nitriles exhibiting a conventional nematic phase over wide temperature ranges. We subjected one of these materials (RM734-CN, Figure SI-3) to the same SAXS/WAXS study used on the splay-nematic material RM734 in this work.

Firstly, we observe that the behaviour of the first four even  $\langle P_n \rangle$  order parameters is typical for a nematic phase, and lack the discontinuous increase seen for the splay-nematic material. The maximum value of each  $\langle P_n \rangle$  of RM734-CN is roughly equal to the maximum value in the nematic phase of RM734, however values are lower than those in the splay nematic phase. At a given reduced temperature values of  $\langle P_2 \rangle$ ,  $\langle P_4 \rangle$  and  $\langle P_6 \rangle$  are lower for the RM734-CN than in the nitro-terminated RM734 whereas  $\langle P_8 \rangle$  was found to be fractionally larger, see Fig. SI-5. While the orientational order parameters are temperature dependent, it should also be noted that the temperature range of the nematic phase of the cyano-terminated material is larger ( $\Delta T/T_{N-iso} \approx 0.16$ ) than that of RM734 ( $\Delta T/T_{N-iso} \approx 0.13$ ). The orientational distribution function of the nitrile terminated material RM734-CN is typical and nematic like, and even at the lowest reduced temperature studied its FWHM is significantly larger than that of the splay-nematic phase of RM734. A plot  $\langle P_4 \rangle$  versus  $\langle P_2 \rangle$  removes the explicit temperature dependence of these two principal order parameters and shows that the behaviour of the nitro- and cyano-terminated materials is effectively identical in the nematic phase. However, the increase in both  $\langle P_2 \rangle$  and  $\langle P_4 \rangle$  that accompanies the onset of the  $N_S$  phase is not observed for RM734-CN.

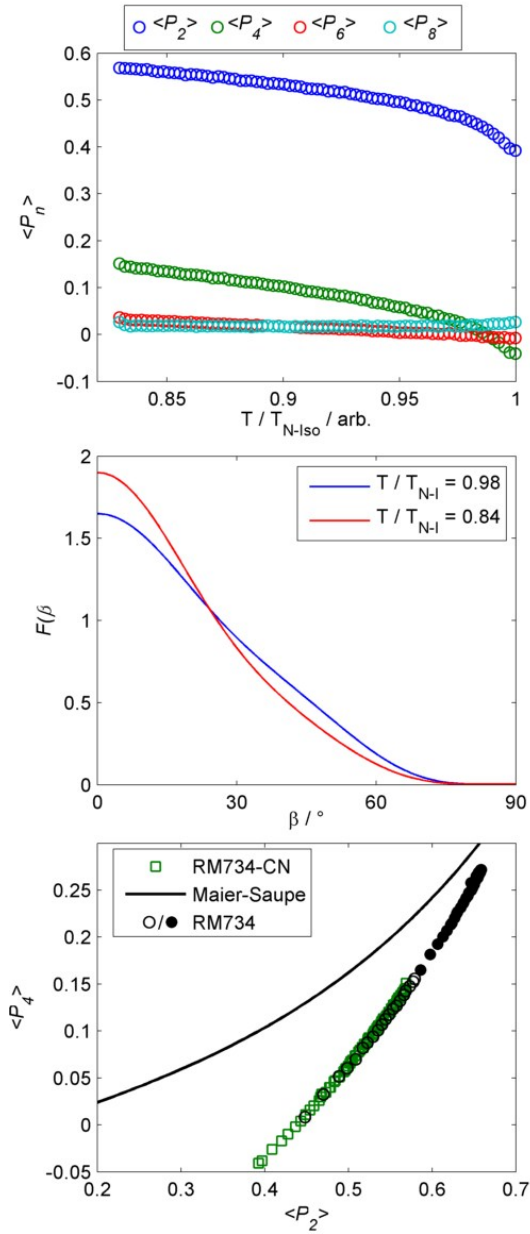

**Fig. SI-4:** Top: Plot of the first four even  $\langle P_n \rangle$  order parameters of RM734-CN as a function of reduced temperature, measured as described in the manuscript text. Middle: Plot of the ODF of RM734-CN at two reduced temperatures. Bottom: Plot of  $\langle P_4 \rangle$  versus  $\langle P_2 \rangle$  for RM734-CN (green squares) and RM734 (empty circles = N phase, filled circles =  $N_5$  phase) along with values from Maier-Saupe theory (solid line).

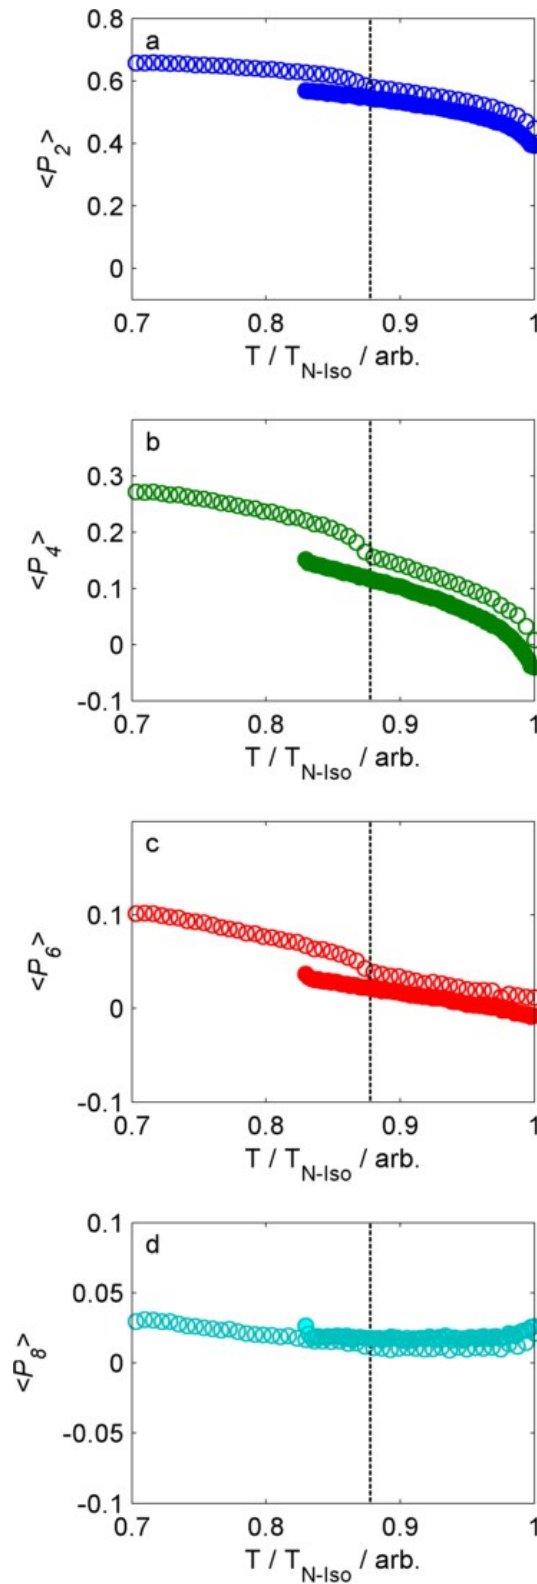

**Fig. SI-5:** Plots of the orientational order parameters  $\langle P_2 \rangle$  (a),  $\langle P_4 \rangle$  (b),  $\langle P_6 \rangle$  (c) and  $\langle P_8 \rangle$  (d) measured by WAXS for RM734 (empty circles) and RM734-CN (filled circles) as a function of reduced temperature. The dashed line corresponds to the  $N_5$ -N transition in RM734, however as discussed in the text this transition is absent in RM734-CN.

## 6. References

1. O. Kratky, *Kolloid Z*, 1933, **64**, 0213-0222
2. P. Davidson, D. Petermann and A. M. Levelut, *J Phys li*, 1995, **5**, 113-131
3. M. T. Sims, L. C. Abbott, R. M. Richardson, J. W. Goodby and J. N. Moore, *Liq Cryst*, 2018, DOI: 10.1080/02678292.2018.1455227, 1-14
4. D. M. Agra-Kooijman, M. R. Fisch and S. Kumar, *Liq Cryst*, 2018, **45**, 680-686
5. R. J. Mandle, S. J. Cowling and J. W. Goodby, *Chemistry*, 2017, **23**, 14554-14562
